# Supplementary material for: Transient reduction of DNA methylation at the onset of meiosis in male mice
Source: PubMed Central journal article supplement (PMC5883305; doi:10.1186/s13072-018-0186-0), 2018-04-04

**Fig. S2**

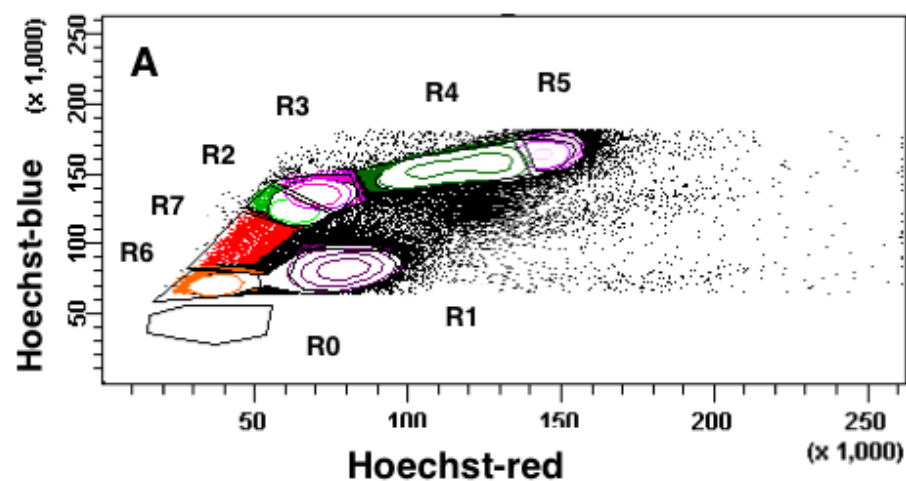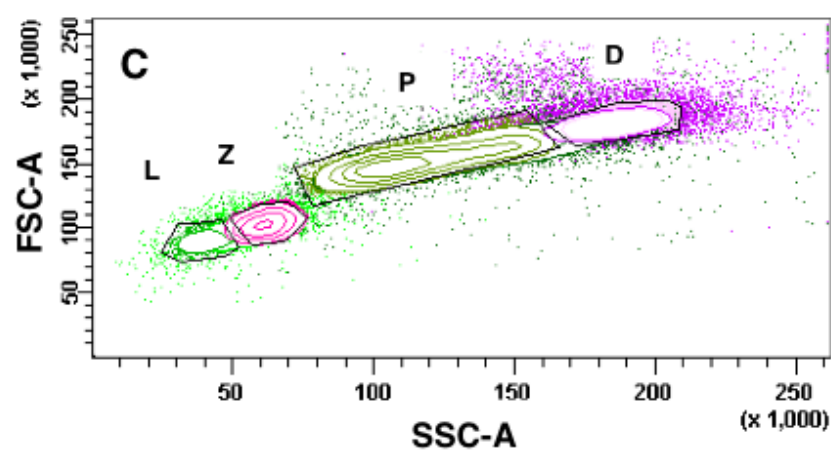

**B**

| Population | #Events   | %Parent | %Total |
|------------|-----------|---------|--------|
| All Events | 1,000,000 | ####    | 100.0  |
| Cells      | 500,947   | 50.1    | 50.1   |
| Alive      | 457,428   | 91.3    | 45.7   |
| DNA        | 407,699   | 89.1    | 40.8   |
| R0         | 312,057   | 76.5    | 31.2   |
| R1         | 21,765    | 5.3     | 2.2    |
| R2         | 4,554     | 1.1     | 0.5    |
| L          | 1,303     | 28.6    | 0.1    |
| R3         | 6,939     | 1.7     | 0.7    |
| Z          | 3,967     | 57.2    | 0.4    |
| R4         | 17,687    | 4.3     | 1.8    |
| P          | 13,620    | 77.0    | 1.4    |
| R5         | 5,344     | 1.3     | 0.5    |
| D          | 2,607     | 48.8    | 0.3    |
| R6         | 4,536     | 1.1     | 0.5    |
| Spg        | 1,707     | 37.6    | 0.2    |
| Soma       | 1,383     | 30.5    | 0.1    |
| R7         | 2,057     | 0.5     | 0.2    |

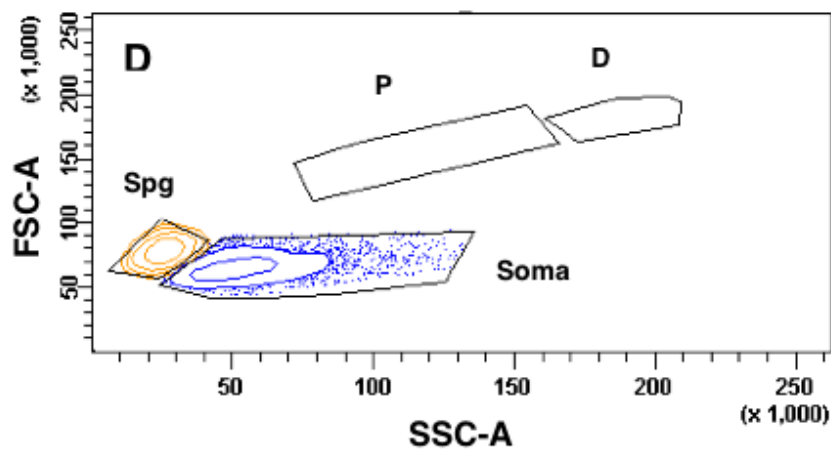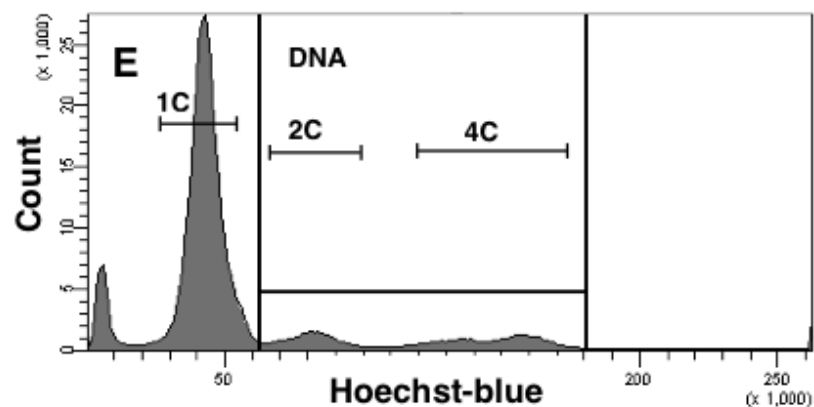

Supplement: 13072_2018_186_MOESM2_ESM.pdf [file 13072_2018_186_MOESM2_ESM.pdf]
