# Supplementary material for: Transient reduction of DNA methylation at the onset of meiosis in male mice
Source: PubMed Central journal article supplement (PMC5883305; doi:10.1186/s13072-018-0186-0), 2018-04-04

**Fig. S3**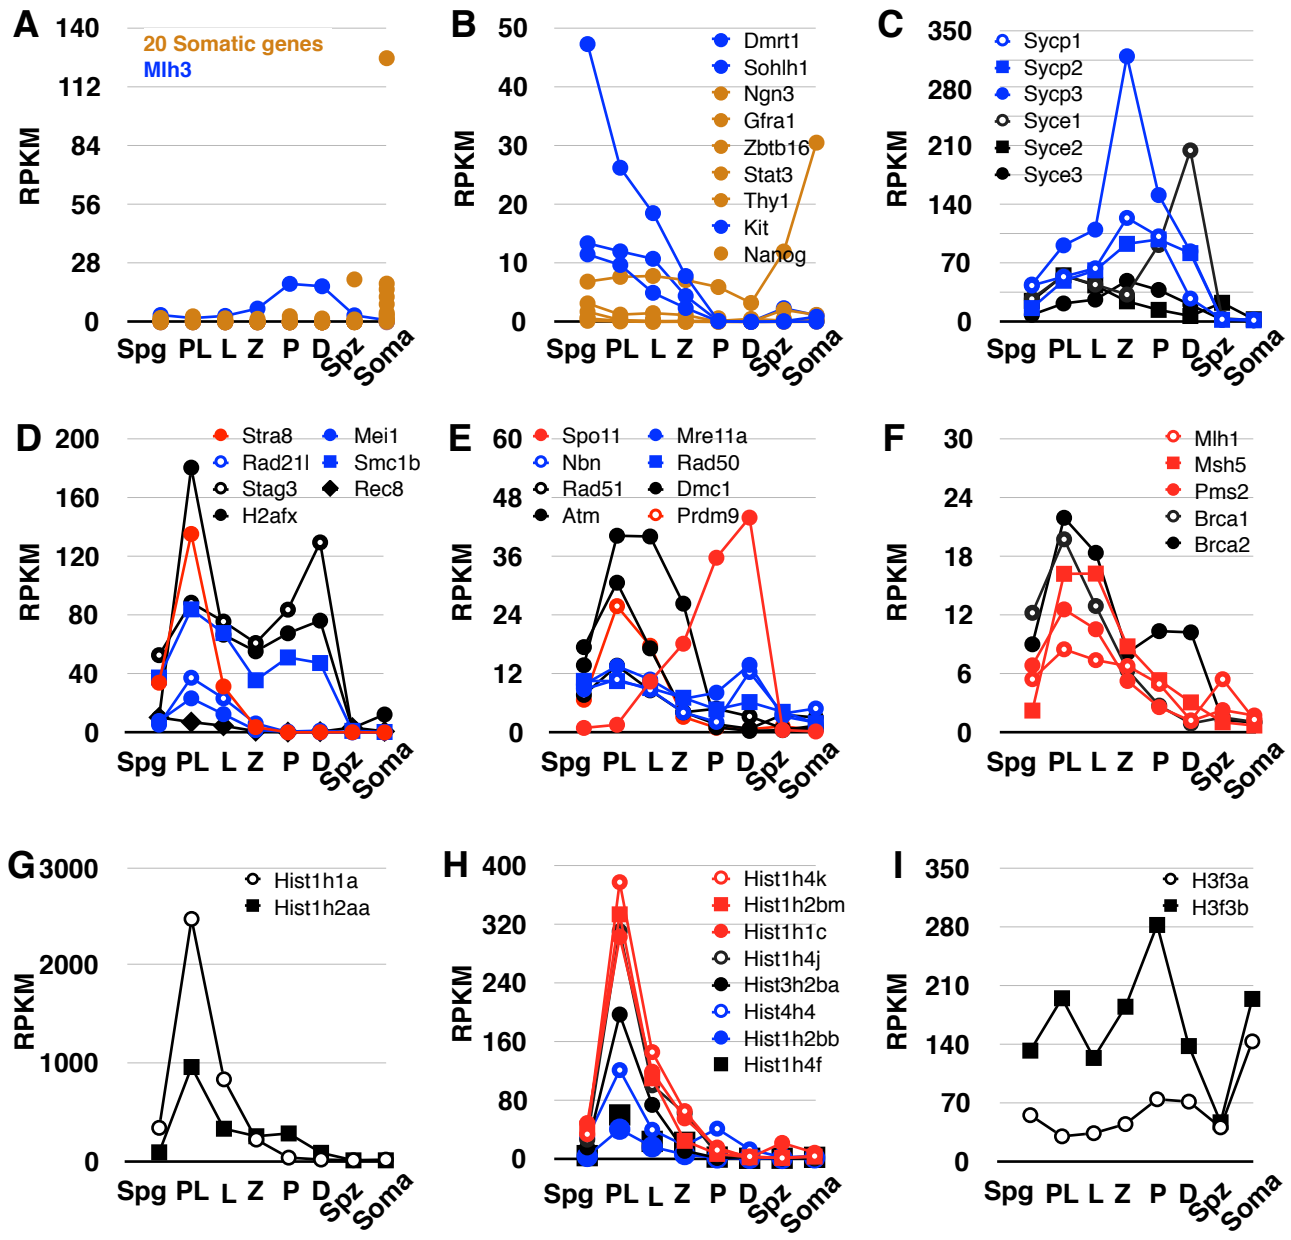

Supplement: 13072_2018_186_MOESM3_ESM.pdf [file 13072_2018_186_MOESM3_ESM.pdf]
